# Supplementary material for: High-throughput circular RNA sequencing reveals the profiles of circular RNA in non-cirrhotic hepatocellular carcinoma
Source: BMC Cancer. 2022 Aug 5;22:857. doi: 10.1186/s12885-022-09909-2 (PMC9356431; doi:10.1186/s12885-022-09909-2)
Supplement: Supplementary file 5 — Additional file 5: Table S3. The differently expressed circRNAs achieved by DESeq2 Data used for plot heatmap [file 12885_2022_9909_MOESM5_ESM.xlsx]

## Sheet: Additional file 5_Table S3
Data used for plot heatmap
	Non_cirrhotic_1	Non_cirrhotic_2	Non_cirrhotic_3	Cirrhotic_1	Cirrhotic_2	Cirrhotic_3
novel_circ_0001544	126.263	158.895	250.56	0	11.1086	47.3347
novel_circ_0001547	607.639	235.401	444.541	11.0698	72.206	189.339
novel_circ_0025529	205.177	0	468.789	11.0698	0	31.5564
hsa_circ_0082307	0	0	0	38.7442	38.8801	63.1129
hsa_circ_0001425	86.8056	29.4251	32.3303	0	0	0
hsa_circ_0003121	39.4571	23.5401	40.4129	0	0	0
hsa_circ_0007752	0	23.5401	113.156	0	0	0
hsa_circ_0007974	110.48	47.0801	40.4129	0	5.55431	0
novel_circ_0001841	0	0	0	94.0932	24.9944	47.3347
novel_circ_0000087	102.588	23.5401	0	0	0	0
hsa_circ_0025583	71.0227	0	0	132.837	380.47	678.464
novel_circ_0020132	0	0	0	22.1396	11.1086	110.448
hsa_circ_0085447	78.9141	23.5401	56.578	0	0	0
novel_circ_0014223	126.263	58.8502	307.138	33.2094	24.9944	0
novel_circ_0028555	71.0227	17.6551	40.4129	0	0	0
hsa_circ_0031560	0	0	0	83.0234	113.863	0
novel_circ_0013290	0	23.5401	0	166.047	102.755	86.7802
novel_circ_0013459	0	0	0	22.1396	158.298	0
novel_circ_0022941	0	0	0	16.6047	22.2172	94.6693
novel_circ_0019127	0	0	32.3303	127.303	205.509	47.3347
hsa_circ_0001361	0	41.1951	0	60.8838	380.47	39.4456
hsa_circ_0057799	0	0	0	177.117	41.6573	23.6673
hsa_circ_0027093	0	0	165.78	0	0	0
hsa_circ_0027090	0	0	145.486	0	0	0
novel_circ_0029466	0	0	210.147	0	0	0
hsa_circ_0017713	0	0	0	16.6047	22.2172	78.8911
novel_circ_0029462	23.6742	0	113.156	0	0	0
hsa_circ_0002228	39.4571	70.6202	80.8257	154.977	127.749	560.127
novel_circ_0016518	0	70.6202	105.073	0	0	0
novel_circ_0023867	63.1313	111.815	428.376	1129.12	752.608	1254.37
novel_circ_0022409	55.2399	11.77	56.578	0	0	0
novel_circ_0029644	15.7828	111.815	0	0	0	0
novel_circ_0015635	47.3485	70.6202	0	0	0	0
hsa_circ_0005219	0	147.125	0	0	0	0
hsa_circ_0068389	181.503	606.157	88.9083	116.233	19.4401	39.4456
novel_circ_0000746	0	0	0	71.9536	19.4401	78.8911
novel_circ_0030728	23.6742	0	145.486	0	0	0
novel_circ_0007577	165.72	0	0	0	0	0
hsa_circ_0066714	55.2399	82.3903	24.2477	0	0	0
novel_circ_0003794	55.2399	35.3101	0	22.1396	341.59	623.24
novel_circ_0013112	0	0	0	60.8838	83.3146	94.6693
hsa_circ_0006367	0	0	0	33.2094	49.9888	39.4456
hsa_circ_0008384	31.5657	41.1951	105.073	0	0	0
novel_circ_0005678	0	0	0	22.1396	94.4232	71.002
hsa_circ_0054248	0	0	0	22.1396	127.749	0
novel_circ_0018824	0	0	0	33.2094	69.4288	15.7782
novel_circ_0010373	0	0	0	0	0	228.784
novel_circ_0006398	23.6742	0	113.156	0	0	0
novel_circ_0026019	0	0	0	22.1396	27.7715	78.8911
novel_circ_0018304	0	11.77	0	121.768	55.5431	78.8911
novel_circ_0013131	0	0	0	33.2094	44.4344	39.4456
novel_circ_0009843	23.6742	17.6551	96.9909	0	0	0
novel_circ_0006402	0	47.0801	64.6606	0	0	0
hsa_circ_0030670	0	0	0	33.2094	102.755	0
novel_circ_0005157	55.2399	35.3101	16.1651	0	0	0
hsa_circ_0003769	78.9141	35.3101	0	0	0	0
novel_circ_0028691	0	0	0	27.6745	19.4401	71.002
novel_circ_0014384	23.6742	17.6551	80.8257	0	0	0
hsa_circ_0003567	110.48	76.5052	48.4954	0	0	23.6673
hsa_circ_0025648	0	23.5401	0	77.4885	24.9944	228.784
hsa_circ_0018484	0	0	0	16.6047	27.7715	94.6693
hsa_circ_0084822	0	0	0	55.3489	66.6517	157.782
novel_circ_0025961	39.4571	35.3101	40.4129	0	0	0
hsa_circ_0015027	0	0	0	55.3489	0	126.226
novel_circ_0018520	0	23.5401	0	60.8838	252.721	0
hsa_circ_0091322	0	0	0	0	169.406	0
hsa_circ_0018814	0	0	0	71.9536	16.6629	78.8911
hsa_circ_0001958	55.2399	76.5052	0	0	0	0
hsa_circ_0017648	181.503	317.791	549.615	55.3489	24.9944	165.671
novel_circ_0011924	0	0	0	16.6047	61.0974	39.4456
novel_circ_0024066	47.3485	47.0801	48.4954	0	0	0
hsa_circ_0004006	71.0227	0	88.9083	0	0	0
novel_circ_0024596	0	0	185.899	0	0	0
hsa_circ_0001986	0	0	0	0	172.183	0
novel_circ_0028492	0	170.666	0	0	0	0
novel_circ_0020008	102.588	105.93	0	0	0	0
novel_circ_0001703	86.8056	0	88.9083	0	0	0
novel_circ_0017963	15.7828	88.2753	32.3303	0	0	0
hsa_circ_0035956	0	0	0	71.9536	52.7659	31.5564
novel_circ_0006444	0	188.321	0	0	0	0
novel_circ_0004137	228.851	182.436	622.358	60.8838	66.6517	71.002
novel_circ_0027608	0	0	0	0	0	181.45
novel_circ_0003819	0	0	0	16.6047	330.481	315.564
hsa_circ_0085782	86.8056	29.4251	24.2477	0	0	0
hsa_circ_0006247	31.5657	64.7352	88.9083	0	0	0
novel_circ_0015002	71.0227	64.7352	96.9909	0	0	0
hsa_circ_0007221	0	0	0	66.4187	27.7715	47.3347
hsa_circ_0007623	55.2399	17.6551	32.3303	0	0	0
novel_circ_0003806	0	0	0	71.9536	127.749	299.786
hsa_circ_0008261	0	52.9652	72.7431	0	0	0
hsa_circ_0030756	0	0	32.3303	44.2791	88.8689	213.006
hsa_circ_0005379	386.679	288.366	743.597	1284.09	1882.91	1609.38
novel_circ_0023634	47.3485	29.4251	40.4129	0	0	0
hsa_circ_0015280	23.6742	35.3101	48.4954	0	0	0
hsa_circ_0043462	63.1313	105.93	0	0	0	0
novel_circ_0014158	94.697	23.5401	0	0	0	0
novel_circ_0027041	0	0	0	55.3489	30.5487	31.5564
hsa_circ_0007294	102.588	29.4251	331.385	49.814	0	0
hsa_circ_0082273	0	0	16.1651	166.047	52.7659	71.002
hsa_circ_0006990	252.525	47.0801	1988.31	171.582	83.3146	157.782
novel_circ_0004249	0	0	177.817	0	0	0
hsa_circ_0004228	23.6742	0	0	121.768	291.601	0
novel_circ_0003111	47.3485	88.2753	32.3303	0	0	0
hsa_circ_0073652	0	23.5401	88.9083	0	0	0
novel_circ_0003077	0	0	0	121.768	33.3258	0
hsa_circ_0006528	0	0	0	71.9536	133.303	0
novel_circ_0025750	0	0	0	44.2791	30.5487	39.4456
novel_circ_0030176	0	0	0	22.1396	105.532	0
novel_circ_0004469	126.263	64.7352	32.3303	0	0	0
hsa_circ_0000413	63.1313	29.4251	129.321	16.6047	0	0
novel_circ_0027918	0	0	0	11.0698	38.8801	157.782
hsa_circ_0007005	0	0	0	71.9536	66.6517	0
hsa_circ_0087249	0	0	0	27.6745	44.4344	55.2238
novel_circ_0015432	0	0	0	11.0698	44.4344	71.002
novel_circ_0018743	0	0	0	55.3489	30.5487	94.6693
novel_circ_0021376	15.7828	23.5401	161.651	0	0	0
hsa_circ_0006545	55.2399	94.1603	0	232.465	466.562	126.226
hsa_circ_0074881	0	105.93	16.1651	0	0	0
hsa_circ_0007948	339.331	41.1951	24.2477	38.7442	8.33146	0
novel_circ_0010354	0	23.5401	96.9909	0	0	0
novel_circ_0013077	0	0	0	132.837	55.5431	0
novel_circ_0006517	0	0	0	16.6047	83.3146	23.6673
hsa_circ_0002101	63.1313	58.8502	0	0	0	0
novel_circ_0014440	0	0	0	0	69.4288	63.1129
hsa_circ_0055161	0	0	0	60.8838	147.189	0
novel_circ_0026458	0	0	0	105.163	36.103	15.7782
hsa_circ_0004888	86.8056	100.045	56.578	271.21	438.79	347.121
hsa_circ_0008757	110.48	17.6551	32.3303	0	0	0
hsa_circ_0008756	757.576	1465.37	1374.04	0	99.9775	599.572
hsa_circ_0008284	55.2399	52.9652	129.321	0	16.6629	0
novel_circ_0018964	0	0	40.4129	110.698	52.7659	189.339
hsa_circ_0043954	31.5657	35.3101	48.4954	0	0	0
hsa_circ_0087893	0	0	0	0	83.3146	47.3347
novel_circ_0019594	0	0	161.651	0	0	0
novel_circ_0010807	828.598	406.066	1398.28	193.721	0	86.7802
hsa_circ_0048259	63.1313	94.1603	0	0	0	0
novel_circ_0019973	102.588	105.93	0	0	0	0
novel_circ_0024361	55.2399	64.7352	0	0	0	0
hsa_circ_0037936	47.3485	200.091	56.578	0	0	31.5564
hsa_circ_0000563	0	70.6202	32.3303	160.512	224.949	220.895
hsa_circ_0000387	205.177	235.401	735.514	60.8838	33.3258	110.448
novel_circ_0023865	0	11.77	0	105.163	55.5431	102.558
hsa_circ_0005114	0	511.997	137.404	0	0	0
hsa_circ_0002468	0	0	0	564.559	588.756	1640.94
novel_circ_0009512	0	0	0	60.8838	41.6573	205.117
hsa_circ_0008979	94.697	111.815	105.073	33.2094	11.1086	0
hsa_circ_0001839	0	0	0	409.582	808.151	0
hsa_circ_0006786	94.697	0	24.2477	0	0	0
novel_circ_0008976	31.5657	17.6551	105.073	0	0	0
novel_circ_0012510	0	0	0	22.1396	69.4288	23.6673
novel_circ_0028566	39.4571	29.4251	64.6606	0	0	0
novel_circ_0008221	63.1313	58.8502	56.578	0	0	0
hsa_circ_0083118	0	0	0	27.6745	24.9944	71.002
novel_circ_0003453	0	0	0	27.6745	13.8858	134.115
novel_circ_0018834	0	0	137.404	0	0	0
novel_circ_0010012	63.1313	0	88.9083	0	0	0
novel_circ_0018546	31.5657	47.0801	137.404	0	8.33146	0
novel_circ_0027511	0	894.523	40.4129	0	0	0
hsa_circ_0064772	23.6742	47.0801	32.3303	0	0	0
novel_circ_0011701	15.7828	17.6551	193.982	0	11.1086	0
hsa_circ_0006621	0	0	0	33.2094	119.418	39.4456
novel_circ_0022537	63.1313	17.6551	48.4954	0	0	0
hsa_circ_0001633	78.9141	541.422	56.578	1666	1194.18	173.56
novel_circ_0014624	0	0	0	38.7442	86.0917	0
novel_circ_0004749	0	0	0	83.0234	55.5431	0
novel_circ_0021506	78.9141	76.5052	40.4129	0	0	0
novel_circ_0021866	15.7828	0	32.3303	44.2791	211.064	110.448
hsa_circ_0037060	39.4571	29.4251	113.156	11.0698	0	0
novel_circ_0002090	0	0	0	55.3489	16.6629	55.2238
novel_circ_0008255	71.0227	29.4251	32.3303	0	0	0
hsa_circ_0029098	63.1313	17.6551	105.073	0	0	0
novel_circ_0010136	142.045	47.0801	0	0	0	0
hsa_circ_0003823	0	0	0	553.489	299.933	930.915
novel_circ_0013633	39.4571	58.8502	105.073	16.6047	0	0
novel_circ_0017277	0	82.3903	40.4129	0	0	0
novel_circ_0021941	39.4571	23.5401	32.3303	0	0	0
novel_circ_0004919	0	47.0801	113.156	0	0	0
hsa_circ_0006932	0	0	0	38.7442	69.4288	63.1129
hsa_circ_0008732	568.182	123.585	218.229	55.3489	0	102.558
hsa_circ_0044287	0	35.3101	80.8257	0	0	0
novel_circ_0025394	0	0	0	44.2791	33.3258	47.3347
hsa_circ_0070660	205.177	117.7	250.56	49.814	0	47.3347
novel_circ_0010987	23.6742	100.045	0	0	0	0
hsa_circ_0017439	0	0	0	27.6745	80.5374	78.8911
novel_circ_0010677	47.3485	88.2753	64.6606	0	0	0
novel_circ_0025713	0	0	0	55.3489	83.3146	0
novel_circ_0001536	0	0	185.899	0	0	0
novel_circ_0001537	23.6742	88.2753	525.367	0	11.1086	47.3347
hsa_circ_0085086	0	0	0	11.0698	0	173.56
hsa_circ_0085081	0	0	0	66.4187	0	78.8911
novel_circ_0029879	0	0	0	0	0	181.45
hsa_circ_0039308	0	76.5052	48.4954	0	0	0
novel_circ_0001702	165.72	0	0	0	0	0
hsa_circ_0085412	55.2399	82.3903	0	0	0	0
hsa_circ_0004803	0	0	0	66.4187	80.5374	0
novel_circ_0003896	0	100.045	56.578	265.675	238.835	773.133
novel_circ_0014760	0	0	202.064	0	0	0
hsa_circ_0001675	0	0	0	60.8838	47.2116	149.893
hsa_circ_0004111	0	0	0	27.6745	19.4401	78.8911
hsa_circ_0085311	71.0227	58.8502	428.376	49.814	27.7715	31.5564
novel_circ_0013232	0	0	0	33.2094	52.7659	47.3347
novel_circ_0020550	15.7828	52.9652	137.404	0	0	15.7782
hsa_circ_0003864	149.937	241.286	24.2477	33.2094	0	0
novel_circ_0017101	63.1313	58.8502	0	0	0	0
hsa_circ_0024986	47.3485	88.2753	0	0	0	0
novel_circ_0005664	0	0	0	38.7442	72.206	23.6673
hsa_circ_0025582	23.6742	0	0	83.0234	161.075	213.006
hsa_circ_0076560	0	0	0	49.814	8.33146	94.6693
hsa_circ_0006469	0	0	0	0	49.9888	94.6693
hsa_circ_0006688	39.4571	35.3101	80.8257	0	0	0
novel_circ_0029136	110.48	70.6202	113.156	0	16.6629	0
hsa_circ_0007158	315.657	288.366	16.1651	935.397	1924.57	954.582
hsa_circ_0004683	118.371	11.77	0	0	0	0
hsa_circ_0062098	47.3485	117.7	0	0	0	0
hsa_circ_0040908	0	0	0	0	52.7659	157.782
novel_circ_0010690	23.6742	41.1951	64.6606	0	0	0
novel_circ_0004871	118.371	23.5401	0	0	0	0
hsa_circ_0006389	118.371	41.1951	40.4129	0	0	0
hsa_circ_0070012	0	0	0	27.6745	33.3258	63.1129
hsa_circ_0077765	0	0	0	83.0234	13.8858	110.448
hsa_circ_0003653	0	253.056	193.982	16.6047	16.6629	0
hsa_circ_0039346	118.371	23.5401	0	0	0	0
hsa_circ_0075917	0	0	0	83.0234	44.4344	78.8911
hsa_circ_0007787	0	17.6551	121.239	0	0	0
novel_circ_0010660	0	0	0	83.0234	136.08	23.6673
novel_circ_0003080	173.611	111.815	0	16.6047	0	0
hsa_circ_0025897	0	0	0	88.5583	24.9944	63.1129
hsa_circ_0004123	0	0	0	88.5583	38.8801	23.6673
hsa_circ_0004524	0	0	0	686.327	477.67	1349.04
hsa_circ_0073244	126.263	23.5401	16.1651	0	0	0
novel_circ_0003412	0	0	0	94.0932	72.206	0
hsa_circ_0010935	0	0	0	0	52.7659	86.7802
hsa_circ_0005042	0	0	0	44.2791	13.8858	94.6693
hsa_circ_0030548	0	0	0	38.7442	44.4344	63.1129
hsa_circ_0085804	0	35.3101	80.8257	0	0	0
novel_circ_0011992	0	0	185.899	0	0	0
hsa_circ_0016115	0	64.7352	121.239	0	0	0
hsa_circ_0008619	0	0	0	16.6047	58.3202	71.002
novel_circ_0018815	0	117.7	0	193.721	622.082	607.462
hsa_circ_0000424	157.828	23.5401	0	0	0	0
novel_circ_0021538	118.371	0	88.9083	0	0	0
hsa_circ_0003559	71.0227	58.8502	0	0	0	0
hsa_circ_0001543	0	0	0	0	161.075	0
hsa_circ_0029051	71.0227	47.0801	56.578	0	5.55431	0
hsa_circ_0008558	702.336	2454.05	897.165	271.21	269.384	694.242
hsa_circ_0006748	110.48	82.3903	64.6606	16.6047	5.55431	0
hsa_circ_0006128	15.7828	35.3101	0	33.2094	155.521	197.228
hsa_circ_0047964	47.3485	47.0801	129.321	0	0	15.7782
hsa_circ_0004074	55.2399	64.7352	0	0	0	0
novel_circ_0024330	134.154	70.6202	0	0	0	0
novel_circ_0010943	94.697	29.4251	0	0	0	0
hsa_circ_0004408	31.5657	11.77	56.578	0	0	0
novel_circ_0020999	323.548	335.446	153.569	0	16.6629	86.7802
novel_circ_0022731	0	0	0	116.233	83.3146	0
hsa_circ_0005003	0	0	0	38.7442	38.8801	39.4456
hsa_circ_0009069	102.588	70.6202	56.578	0	0	0
hsa_circ_0002718	71.0227	64.7352	64.6606	0	0	0
novel_circ_0011834	23.6742	47.0801	72.7431	0	0	0
novel_circ_0011798	0	0	137.404	0	0	0
novel_circ_0003789	0	0	0	0	33.3258	110.448
hsa_circ_0037655	0	0	0	22.1396	47.2116	39.4456
novel_circ_0003810	0	0	0	44.2791	133.303	134.115
novel_circ_0006879	0	0	0	27.6745	77.7603	47.3347
hsa_circ_0058528	0	0	0	77.4885	0	134.115
novel_circ_0025009	0	0	0	55.3489	102.755	55.2238
hsa_circ_0032251	31.5657	64.7352	64.6606	0	0	0
hsa_circ_0053440	0	0	0	0	88.8689	71.002
novel_circ_0027679	0	0	0	55.3489	86.0917	23.6673
novel_circ_0006573	0	0	0	22.1396	149.966	0
novel_circ_0003803	126.263	0	0	132.837	413.796	646.907
novel_circ_0024270	47.3485	17.6551	40.4129	0	0	0
novel_circ_0024275	78.9141	64.7352	0	0	0	0
novel_circ_0002196	0	0	0	0	0	228.784
novel_circ_0019582	23.6742	41.1951	32.3303	0	0	0
novel_circ_0004664	78.9141	2677.68	274.807	143.907	0	23.6673
hsa_circ_0008272	55.2399	23.5401	32.3303	0	0	0
hsa_circ_0005613	0	0	0	83.0234	63.8745	23.6673
hsa_circ_0067435	0	0	0	16.6047	41.6573	55.2238
hsa_circ_0018848	0	0	0	94.0932	33.3258	47.3347
novel_circ_0017066	0	0	0	11.0698	24.9944	78.8911
novel_circ_0009359	47.3485	17.6551	40.4129	0	0	0
novel_circ_0003829	94.697	0	0	127.303	336.036	733.687
hsa_circ_0057768	55.2399	41.1951	48.4954	0	0	0
novel_circ_0011596	0	111.815	72.7431	0	0	0
hsa_circ_0007587	47.3485	70.6202	80.8257	199.256	222.172	347.121
novel_circ_0025345	0	0	145.486	0	0	0
hsa_circ_0018184	0	35.3101	0	38.7442	266.607	39.4456
hsa_circ_0008434	23.6742	29.4251	169.734	11.0698	0	0
hsa_circ_0003490	94.697	52.9652	0	0	0	0
novel_circ_0012479	0	0	0	60.8838	52.7659	31.5564
novel_circ_0024757	0	0	0	0	86.0917	86.7802
novel_circ_0026107	0	0	0	71.9536	33.3258	39.4456
novel_circ_0001448	39.4571	41.1951	24.2477	0	0	0
hsa_circ_0016559	0	76.5052	40.4129	0	0	0
novel_circ_0012452	94.697	35.3101	24.2477	0	0	0
novel_circ_0021061	260.417	235.401	80.8257	66.4187	13.8858	23.6673
hsa_circ_0075737	63.1313	0	113.156	0	0	0
novel_circ_0014616	110.48	147.125	0	182.651	1252.5	94.6693
hsa_circ_0014178	55.2399	29.4251	64.6606	0	0	0
hsa_circ_0032406	0	70.6202	64.6606	0	0	0
novel_circ_0002960	0	0	0	16.6047	88.8689	23.6673
novel_circ_0011029	63.1313	52.9652	0	0	0	0
hsa_circ_0062984	0	0	0	71.9536	36.103	86.7802
novel_circ_0026215	0	0	161.651	0	0	0
novel_circ_0017999	0	0	0	27.6745	72.206	94.6693
hsa_circ_0008296	189.394	147.125	105.073	11.0698	0	55.2238
hsa_circ_0025219	31.5657	88.2753	88.9083	0	11.1086	0
hsa_circ_0086420	0	0	161.651	0	0	0
novel_circ_0020983	31.5657	147.125	0	0	0	0
hsa_circ_0004405	481.376	441.376	161.651	1715.82	3910.23	978.25
novel_circ_0029866	0	0	0	60.8838	91.646	0
novel_circ_0018512	0	0	0	38.7442	11.1086	102.558
hsa_circ_0068629	0	0	202.064	0	0	0
novel_circ_0014488	55.2399	58.8502	0	0	0	0
novel_circ_0003228	55.2399	0	0	188.186	219.395	39.4456
novel_circ_0023266	0	0	153.569	0	0	0
novel_circ_0027929	0	0	0	0	11.1086	181.45
hsa_circ_0002473	197.285	52.9652	40.4129	0	0	0
novel_circ_0023077	315.657	200.091	105.073	33.2094	8.33146	78.8911
hsa_circ_0084927	118.371	441.376	0	0	0	0
novel_circ_0003411	39.4571	29.4251	0	49.814	563.762	0
novel_circ_0029787	0	0	145.486	0	0	0
novel_circ_0028451	0	0	0	0	130.526	78.8911
hsa_circ_0075872	47.3485	52.9652	16.1651	0	0	0
novel_circ_0021120	78.9141	47.0801	40.4129	0	8.33146	0
hsa_circ_0068472	0	0	0	127.303	0	39.4456
novel_circ_0025467	142.045	0	565.78	0	0	0
novel_circ_0009646	39.4571	141.24	72.7431	16.6047	0	0
novel_circ_0019874	94.697	35.3101	0	0	0	0
hsa_circ_0004420	0	0	0	204.791	0	0
hsa_circ_0039550	0	0	0	27.6745	11.1086	86.7802
hsa_circ_0025750	55.2399	64.7352	48.4954	0	0	0
novel_circ_0027562	0	0	137.404	0	0	0
hsa_circ_0002282	0	0	0	105.163	41.6573	15.7782
novel_circ_0005366	0	0	137.404	0	0	0
hsa_circ_0045502	63.1313	82.3903	32.3303	0	0	0
hsa_circ_0015352	0	29.4251	88.9083	0	0	0
hsa_circ_0032969	228.851	117.7	339.468	55.3489	0	0
novel_circ_0021593	31.5657	35.3101	0	88.5583	27.7715	639.018
novel_circ_0029655	86.8056	100.045	929.496	44.2791	0	31.5564
hsa_circ_0006903	0	35.3101	129.321	0	0	0
hsa_circ_0004947	0	82.3903	40.4129	0	0	0
hsa_circ_0063604	0	47.0801	64.6606	0	0	0
hsa_circ_0028099	47.3485	117.7	0	0	0	0
hsa_circ_0016302	0	0	0	60.8838	13.8858	63.1129
hsa_circ_0087840	0	0	161.651	0	0	0
hsa_circ_0069320	0	0	0	49.814	13.8858	94.6693
novel_circ_0030032	0	82.3903	64.6606	0	0	0
hsa_circ_0007862	0	0	32.3303	132.837	102.755	55.2238
novel_circ_0013894	55.2399	41.1951	169.734	0	0	0
hsa_circ_0001458	0	0	137.404	0	0	0
hsa_circ_0073836	0	0	32.3303	88.5583	47.2116	284.008
novel_circ_0018559	0	0	0	99.6281	47.2116	0
hsa_circ_0085173	260.417	541.422	0	0	0	0
hsa_circ_0083822	0	0	0	33.2094	27.7715	78.8911
novel_circ_0026116	0	0	0	55.3489	24.9944	55.2238
hsa_circ_0004650	291.982	300.136	40.4129	44.2791	24.9944	63.1129
novel_circ_0024442	0	0	145.486	0	0	0
novel_circ_0021382	0	35.3101	88.9083	0	0	0
novel_circ_0004252	0	0	0	27.6745	99.9775	39.4456
hsa_circ_0014877	0	0	0	33.2094	22.2172	71.002
hsa_circ_0008115	39.4571	29.4251	24.2477	0	0	0
hsa_circ_0008117	0	0	0	49.814	27.7715	78.8911
hsa_circ_0002173	0	0	0	55.3489	16.6629	47.3347
novel_circ_0013992	0	0	0	44.2791	13.8858	55.2238
novel_circ_0020042	347.222	600.272	307.138	127.303	80.5374	118.337
hsa_circ_0003339	0	0	0	38.7442	41.6573	142.004
hsa_circ_0006678	0	0	0	22.1396	116.64	0
hsa_circ_0030787	118.371	29.4251	0	0	0	0
novel_circ_0020277	55.2399	47.0801	96.9909	0	11.1086	0
novel_circ_0022147	149.937	70.6202	24.2477	0	0	0
hsa_circ_0007108	220.96	494.342	72.7431	835.769	1630.19	362.899
hsa_circ_0001083	347.222	200.091	299.055	708.466	1033.1	741.576
hsa_circ_0018767	0	0	0	22.1396	19.4401	157.782
hsa_circ_0072425	39.4571	23.5401	72.7431	0	0	0
hsa_circ_0006080	0	0	0	66.4187	88.8689	0
novel_circ_0021144	0	0	0	11.0698	127.749	0
novel_circ_0020091	0	0	0	110.698	41.6573	0
hsa_circ_0000450	63.1313	235.401	48.4954	33.2094	0	0
novel_circ_0024553	15.7828	17.6551	0	55.3489	222.172	23.6673
hsa_circ_0076704	0	0	0	16.6047	16.6629	126.226
hsa_circ_0001417	102.588	58.8502	32.3303	11.0698	0	0
novel_circ_0002971	0	0	0	66.4187	24.9944	39.4456
novel_circ_0005300	0	0	0	33.2094	16.6629	63.1129
hsa_circ_0073121	0	29.4251	40.4129	304.419	155.521	497.014
novel_circ_0014504	0	0	0	33.2094	94.4232	47.3347
hsa_circ_0046964	47.3485	0	72.7431	0	0	0
novel_circ_0028450	118.371	41.1951	32.3303	44.2791	372.138	1514.71
hsa_circ_0070657	0	0	0	55.3489	55.5431	23.6673
hsa_circ_0047612	0	41.1951	80.8257	0	0	0
novel_circ_0007110	0	0	0	110.698	55.5431	94.6693
novel_circ_0014799	0	82.3903	64.6606	0	0	0
hsa_circ_0000660	0	0	185.899	0	0	0
