# Supplementary material for: High-throughput circular RNA sequencing reveals the profiles of circular RNA in non-cirrhotic hepatocellular carcinoma
Source: BMC Cancer. 2022 Aug 5;22:857. doi: 10.1186/s12885-022-09909-2 (PMC9356431; doi:10.1186/s12885-022-09909-2)
Supplement: Supplementary file 10 — Additional file 10: Table S7. [file 12885_2022_9909_MOESM10_ESM.xlsx]

## Sheet: Down-enriched items
The enrichment results of host genes of down-regulated circRNAs
Category	Term	Count	%	PValue	Genes	List Total	Pop Hits	Pop Total	Fold Enrichment	Bonferroni	Benjamini	FDR\
GOTERM_BP_DIRECT	GO:0045893~positive regulation of transcription, DNA-templated	11	8.0292	0.00385282	HMBOX1, CREBBP, PPP3CB, MED13, CREB1, TESC, TRIM24, GPBP1L1, PPARG, RNF4, HINFP	121	515	16792	2.96417	0.94762	1	1.0\
GOTERM_BP_DIRECT	GO:0007584~response to nutrient	4	2.91971	0.0159702	LDHA, ACSL4, PPARG, ARSB	121	74	16792	7.50145	0.999995	1	1.0\
GOTERM_BP_DIRECT	GO:0042787~protein ubiquitination involved in ubiquitin-dependent protein catabolic process	5	3.64964	0.0241285	HERC4, HECTD1, RNF217, WWP1, FBXO7	121	153	16792	4.53519	1	1	1.0\
GOTERM_BP_DIRECT	GO:0035338~long-chain fatty-acyl-CoA biosynthetic process	3	2.18978	0.0362117	ACOT9, ACSL4, ACSF3	121	42	16792	9.91263	1	1	1.0\
GOTERM_BP_DIRECT	GO:1903599~positive regulation of mitophagy	2	1.45985	0.0421249	HTT, FBXO7	121	6	16792	46.259	1	1	1.0\
GOTERM_BP_DIRECT	GO:0016567~protein ubiquitination	7	5.10949	0.0440619	FBXW8, TRIM24, WWP1, DCAF8, BIRC6, RNF4, FBXO7	121	359	16792	2.70596	1	1	1.0\
GOTERM_BP_DIRECT	GO:0035176~social behavior	3	2.18978	0.0461539	PCM1, PPP3CB, VPS13A	121	48	16792	8.67355	1	1	1.0\
GOTERM_BP_DIRECT	GO:0006610~ribosomal protein import into nucleus	2	1.45985	0.0557717	TNPO1, IPO5	121	8	16792	34.6942	1	1	1.0\
GOTERM_BP_DIRECT	GO:0060712~spongiotrophoblast layer development	2	1.45985	0.0557717	FBXW8, BIRC6	121	8	16792	34.6942	1	1	1.0\
GOTERM_BP_DIRECT	GO:0000059~protein import into nucleus, docking	2	1.45985	0.0557717	TNPO1, IPO5	121	8	16792	34.6942	1	1	1.0\
GOTERM_BP_DIRECT	GO:0010629~negative regulation of gene expression	4	2.91971	0.0750677	NDFIP2, CREB1, CD46, HINFP	121	137	16792	4.05188	1	1	1.0\
GOTERM_BP_DIRECT	GO:0001946~lymphangiogenesis	2	1.45985	0.0758812	PPP3CB, BMPR2	121	11	16792	25.2322	1	1	1.0\
GOTERM_BP_DIRECT	GO:0043627~response to estrogen	3	2.18978	0.0787668	LDHA, PPARG, ARSB	121	65	16792	6.40509	1	1	1.0\
GOTERM_BP_DIRECT	GO:0007041~lysosomal transport	2	1.45985	0.0824895	VPS54, ARSB	121	12	16792	23.1295	1	1	1.0\
GOTERM_BP_DIRECT	GO:0006886~intracellular protein transport	5	3.64964	0.0890995	SEC24B, USO1, TNPO1, EVI5, IPO5	121	236	16792	2.94019	1	1	1.0\
GOTERM_BP_DIRECT	GO:0071300~cellular response to retinoic acid	3	2.18978	0.0894075	CYP26B1, TESC, PPARG	121	70	16792	5.94758	1	1	1.0\
GOTERM_BP_DIRECT	GO:0045944~positive regulation of transcription from RNA polymerase II promoter	12	8.75912	0.0920748	CREBBP, PPP3CB, MED13, BMPR2, CREB1, PPARG, NRF1, SOX6, NR3C1, RNF4, ATF6, ETV6	121	981	16792	1.69758	1	1	1.0\
GOTERM_BP_DIRECT	GO:0006367~transcription initiation from RNA polymerase II promoter	4	2.91971	0.0953369	CREBBP, MED13, PPARG, NR3C1	121	152	16792	3.65202	1	1	1.0\
GOTERM_BP_DIRECT	GO:0007030~Golgi organization	3	2.18978	0.0982075	FBXW8, USO1, HTT	121	74	16792	5.62609	1	1	1.0}
GOTERM_CC_DIRECT	GO:0016020~membrane	26	18.9781	0.0120629	PIGN, USO1, GDI2, AGAP1, ITPR2, PCSK6, IPO5, HS2ST1, PPP2CA, LDHA, PCM1, MED13, KCNT2, AGFG2, SEC24B, DIS3, RYK, C1GALT1, ACSL4, EML4, XKR9, P4HA1, HEATR5B, BIRC6, UTRN, ATF6	131	2200	18224	1.64408	0.896634	1	1.0\
GOTERM_CC_DIRECT	GO:0005794~Golgi apparatus	13	9.48905	0.0205199	NDFIP2, FBXW8, USO1, GDI2, HTT, IPO5, VPS54, ST3GAL6, PPARG, CD46, EVI5, ATF6, ARSB	131	863	18224	2.09558	0.97929	1	1.0\
GOTERM_CC_DIRECT	GO:0005737~cytoplasm	49	35.7664	0.0249528	DOCK5, BMPR2, GDI2, RAPH1, DCAF8, NR3C1, IPO5, TTC28, HERC4, CYP26B1, PCM1, XPO5, AOX1, MAP3K8, TNPO1, FBXO7, TNPO3, UPF2, FBXW8, SWAP70, TESC, ACSL4, CD2AP, ETV6, EML4, EML6, DPYD, PPIG, UTRN, MAD1L1, HTT, AGAP1, RNF4, HMBOX1, LDHA, HECTD1, CEP70, RNF217, EVC2, NDFIP2, CREBBP, TPRG1, RYK, DNAH14, WWP1, ANKHD1, CENPI, KIF26B, TTC3	131	5222	18224	1.30536	0.991133	1	1.0\
GOTERM_CC_DIRECT	GO:0005634~nucleus	50	36.4964	0.030538	ZNF451, DCAF8, ZNF44, SOBP, NR3C1, IPO5, HERC4, MED13, XPO5, TRIM24, SOX6, TNPO1, FBXO7, UPF2, SWAP70, TESC, ZFX, ETV6, CREB1, AEBP2, SDE2, ZNF514, PPARG, PPIG, ATF6, MAD1L1, PSMD14, HTT, NRF1, RNF4, PPP2CA, HMBOX1, LDHA, HECTD1, GPBP1L1, EVI5, PMS1, EVC2, CREBBP, KDM4C, DENND4A, RYK, WWP1, BTBD7, HINFP, TARBP1, GON4L, CENPI, TTC3, APLF	131	5415	18224	1.28453	0.996971	1	1.0\
GOTERM_CC_DIRECT	GO:0005829~cytosol	33	24.0876	0.0402942	PSMD14, USO1, GDI2, HTT, PPP2CA, HERC4, PPP3CB, LDHA, PCM1, CEP70, RNF217, XPO5, TRIM24, VPS54, AOX1, MAP3K8, TNPO1, FBXO7, EVI5, UPF2, SEC24B, DIS3, VPS13A, WWP1, PCCA, CENPI, PARD3, DPYD, APLF, PPARG, RAPGEF6, FBXL4, MAD1L1	131	3315	18224	1.38485	0.999543	1	1.0\
GOTERM_CC_DIRECT	GO:0000151~ubiquitin ligase complex	4	2.91971	0.0421569	RNF217, WWP1, FBXO7, FBXL4	131	108	18224	5.15239	0.999682	1	1.0\
GOTERM_CC_DIRECT	GO:0000922~spindle pole	4	2.91971	0.0431313	PPP2CA, BIRC6, MAD1L1, TTC28	131	109	18224	5.10512	0.999737	1	1.0\
GOTERM_CC_DIRECT	GO:0005654~nucleoplasm	28	20.438	0.0563221	PSMD14, HTT, NRF1, NR3C1, RNF4, IPO5, PPP3CB, MED13, CEP70, XPO5, SOX6, ZNF143, CREBBP, RFC4, KDM4C, DIS3, ANKHD1, HINFP, TOX2, CREB1, AEBP2, CENPI, APLF, PPARG, PPIG, UTRN, ATF6, FBXL4	131	2784	18224	1.39914	0.99998	1	1.0\
GOTERM_CC_DIRECT	GO:0000139~Golgi membrane	9	6.56934	0.0611823	NDST1, NDFIP2, SEC24B, C1GALT1, USO1, GXYLT1, ST3GAL6, ATF6, HS2ST1	131	591	18224	2.11849	0.999993	1	1.0\
GOTERM_CC_DIRECT	GO:0031965~nuclear membrane	5	3.64964	0.0815802	PCM1, CEP70, TNPO1, TNPO3, IPO5	131	229	18224	3.03743	1	1	1.0\
GOTERM_CC_DIRECT	GO:0005759~mitochondrial matrix	6	4.37956	0.0850823	ACOT9, CREB1, ALDH5A1, PCCA, NR3C1, ACSF3	131	327	18224	2.55256	1	1	1.0\
GOTERM_CC_DIRECT	GO:0005643~nuclear pore	3	2.18978	0.0935195	MAD1L1, IPO5, AGFG1	131	72	18224	5.79644	1	1	1.0\
GOTERM_CC_DIRECT	GO:0005758~mitochondrial intermembrane space	3	2.18978	0.0979384	PRELID2, GATM, FBXL4	131	74	18224	5.63978	1	1	1.0\
GOTERM_MF_DIRECT	GO:0004842~ubiquitin-protein transferase activity	11	8.0292	0.000105	HERC4, HECTD1, FBXW8, TTC3, RNF217, TRIM24, WWP1, BIRC6, RNF4, FBXO7, FBXL4	119	329	16881	4.74294	0.0291595	0.0166036	0.016603565080889515\
GOTERM_MF_DIRECT	GO:0016874~ligase activity	10	7.29927	0.000117	KCMF1, ZNF451, HERC4, HECTD1, TTC3, RNF217, TRIM24, WWP1, BIRC6, RNF4	119	270	16881	5.25397	0.0326637	0.0166036	0.016603565080889515\
GOTERM_MF_DIRECT	GO:0003713~transcription coactivator activity	7	5.10949	0.00794983	CREBBP, MED13, TRIM24, RNF4, ZFX, ATF6, HINFP	119	248	16881	4.00403	0.895524	0.749934	0.7499342494388798\
GOTERM_MF_DIRECT	GO:0008565~protein transporter activity	4	2.91971	0.0139965	USO1, TNPO1, TNPO3, IPO5	119	72	16881	7.88095	0.981481	0.749961	0.7499607812049816\
GOTERM_MF_DIRECT	GO:0046872~metal ion binding	24	17.5182	0.015764	KCMF1, ZNF451, ZNF143, BMPR2, PSMD14, C1GALT1, AGAP1, ZNF44, SOBP, ZFX, HINFP, PPP2CA, HECTD1, AEBP2, PCCA, RNF217, APLF, DPYD, ZNF514, AOX1, AGFG2, ARSB, AGFG1, TRABD2A	119	2069	16881	1.64552	0.988855	0.749961	0.7499607812049816\
GOTERM_MF_DIRECT	GO:0008139~nuclear localization sequence binding	3	2.18978	0.0162661	TNPO1, TNPO3, IPO5	119	28	16881	15.199	0.990354	0.749961	0.7499607812049816\
GOTERM_MF_DIRECT	GO:0008536~Ran GTPase binding	3	2.18978	0.0185503	XPO5, TNPO1, IPO5	119	30	16881	14.1857	0.995004	0.749961	0.7499607812049816\
GOTERM_MF_DIRECT	GO:0019899~enzyme binding	7	5.10949	0.029514	PPP3CB, RFC4, KDM4C, CREB1, PCCA, PPARG, HINFP	119	333	16881	2.98198	0.999792	1	1.0\
GOTERM_MF_DIRECT	GO:0003700~transcription factor activity, sequence-specific DNA binding	13	9.48905	0.0363753	ZNF451, CREBBP, NR3C1, RNF4, ZFX, HINFP, ETV6, CREB1, ZNF514, GPBP1L1, PPARG, SOX6, ATF6	119	961	16881	1.91898	0.999972	1	1.0\
GOTERM_MF_DIRECT	GO:0032184~SUMO polymer binding	2	1.45985	0.0412205	SOBP, RNF4	119	6	16881	47.2857	0.999993	1	1.0\
GOTERM_MF_DIRECT	GO:0003677~DNA binding	19	13.8686	0.042622	ZNF143, RFC4, DENND4A, SWAP70, ZNF44, NR3C1, RNF4, ZFX, HINFP, HMBOX1, TOX2, GON4L, CREB1, ZNF514, GPBP1L1, PPARG, SOX6, PMS1, AGFG1	119	1674	16881	1.61009	0.999996	1	1.0\
GOTERM_MF_DIRECT	GO:0004175~endopeptidase activity	3	2.18978	0.0547856	CD46, PCSK6, TRABD2A	119	54	16881	7.88095	1	1	1.0\
GOTERM_MF_DIRECT	GO:0031957~very long-chain fatty acid-CoA ligase activity	2	1.45985	0.0677603	ACSL4, ACSF3	119	10	16881	28.3714	1	1	1.0\
GOTERM_MF_DIRECT	GO:0042802~identical protein binding	10	7.29927	0.0791672	HMBOX1, LDHA, PCM1, CREB1, CEP70, HTT, PPARG, RNF4, ATF6, TNPO3	119	749	16881	1.89395	1	1	1.0\
GOTERM_MF_DIRECT	GO:0002039~p53 binding	3	2.18978	0.0798944	CREBBP, TRIM24, HTT	119	67	16881	6.35181	1	1	1.0\
GOTERM_MF_DIRECT	GO:0035497~cAMP response element binding	2	1.45985	0.0871859	CREB1, ATF6	119	13	16881	21.8242	1	1	1.0\
GOTERM_MF_DIRECT	GO:0003712~transcription cofactor activity	3	2.18978	0.0882205	CREBBP, MED13, CREB1	119	71	16881	5.99396	1	1	1.0\
GOTERM_MF_DIRECT	GO:0005515~protein binding	70	51.0949	0.0945976	DOCK5, ZNF451, BMPR2, GDI2, RAPH1, DCAF8, NR3C1, IPO5, NDST1, PPP3CB, PCM1, XPO5, TRIM24, MAP3K8, SOX6, TNPO1, FBXO7, TNPO3, AGFG1, UPF2, RFC4, FBXW8, DIS3, SWAP70, TESC, VPS13A, CD2AP, ETV6, CREB1, SCN8A, PARD3, DPYD, PPARG, BIRC6, PPIG, CD46, UTRN, ATF6, RAPGEF6, MAD1L1, PSMD14, USP54, USO1, HTT, NRF1, RNF4, PRH1, KNG1, PPP2CA, HMBOX1, LDHA, HECTD1, CEP70, VPS54, SNX7, EVI5, ZNF143, SEC24B, NDF…	119	8785	16881	1.13034	1	1	1.0\
KEGG_PATHWAY	hsa04922:Glucagon signaling pathway	5	3.64964	0.00836611	LDHA, CREBBP, PPP3CB, CREB1, ITPR2	57	99	6879	6.09516	0.688943	1	1.0\
KEGG_PATHWAY	hsa05016:Huntington's disease	6	4.37956	0.019433	CREBBP, CREB1, DNAH14, HTT, PPARG, NRF1	57	192	6879	3.77138	0.934636	1	1.0\
KEGG_PATHWAY	hsa00280:Valine, leucine and isoleucine degradation	3	2.18978	0.05573	PCCA, AOX1, ACSF3	57	47	6879	7.70325	0.999655	1	1.0\
KEGG_PATHWAY	hsa01100:Metabolic pathways	16	11.6788	0.0591382	PIGN, C1GALT1, ACSL4, COQ5, NDST1, LDHA, GATM, CYP26B1, ALDH5A1, LIPC, PCCA, P4HA1, DPYD, AOX1, ST3GAL6, ARSB	57	1219	6879	1.58404	0.999791	1	1.0\
KEGG_PATHWAY	hsa04728:Dopaminergic synapse	4	2.91971	0.0856911	PPP2CA, PPP3CB, CREB1, ITPR2	57	128	6879	3.77138	0.999996	1	1.0\
KEGG_PATHWAY	hsa04924:Renin secretion	3	2.18978	0.0953207	PPP3CB, CREB1, ITPR2	57	64	6879	5.65707	0.999999	1	1.0\

## Sheet: Down-circRNAs and source genes
Down-regulated circRNAs	Source_gene_name
hsa_circ_0082307	NRF1
novel_circ_0001841	--
hsa_circ_0025583	AC011604.2;SLCO1B7
novel_circ_0020132	TPRG1
hsa_circ_0031560	AL139353.1;HEATR5A
novel_circ_0013290	TARBP1
novel_circ_0013459	KIF26B
novel_circ_0022941	PRELID2
novel_circ_0019127	PPARG
hsa_circ_0001361	FNDC3B
hsa_circ_0057799	BMPR2
hsa_circ_0017713	UPF2
hsa_circ_0002228	CRPPA
novel_circ_0023867	ARSB
novel_circ_0000746	MAP3K8
novel_circ_0003794	AC011604.2;SLCO1B3
novel_circ_0013112	DNAH14
hsa_circ_0006367	CENPI
novel_circ_0005678	HECTD1
hsa_circ_0054248	EML4
novel_circ_0018824	ZNF514
novel_circ_0010373	PIGN
novel_circ_0026019	NRF1
novel_circ_0018304	EML6
novel_circ_0013131	SDE2
hsa_circ_0030670	IPO5
novel_circ_0028691	VPS13B
hsa_circ_0025648	ITPR2
hsa_circ_0018484	HERC4
hsa_circ_0084822	WWP1
hsa_circ_0015027	ATF6
novel_circ_0018520	VPS54
hsa_circ_0091322	ACSL4
hsa_circ_0018814	PPP3CB
novel_circ_0011924	GON4L
hsa_circ_0001986	NDST1
hsa_circ_0035956	DENND4A
novel_circ_0027608	--
novel_circ_0003819	AC011604.2;AC022335.1;SLCO1B7
hsa_circ_0007221	USP54
novel_circ_0003806	SLCO1B7
hsa_circ_0030756	PCCA
hsa_circ_0005379	GDI2
novel_circ_0027041	C1GALT1
hsa_circ_0082273	TNPO3
hsa_circ_0004228	EVC2
novel_circ_0003077	--
hsa_circ_0006528	PRELID2
novel_circ_0025750	AGFG2
novel_circ_0030176	ACSL4
novel_circ_0027918	FGL1
hsa_circ_0007005	--;--
hsa_circ_0087249	VPS13A
novel_circ_0015432	TTC3
novel_circ_0018743	KCMF1
hsa_circ_0006545	--
novel_circ_0013077	DNAH14
novel_circ_0006517	PCSK6
novel_circ_0014440	HS2ST1;AC093155.3
hsa_circ_0055161	CYP26B1
novel_circ_0026458	AC069288.1;MAD1L1
hsa_circ_0004888	PPIG
novel_circ_0018964	NECTIN3
hsa_circ_0087893	TMEM245
hsa_circ_0000563	BTBD7
novel_circ_0023865	ARSB
hsa_circ_0002468	CEP70
novel_circ_0009512	MED13
hsa_circ_0001839	KDM4C
novel_circ_0012510	KCNT2
hsa_circ_0083118	LMBR1
novel_circ_0003453	COQ5
hsa_circ_0006621	TNPO1
hsa_circ_0001633	SOBP
novel_circ_0014624	SNX7
novel_circ_0004749	TMTC4
novel_circ_0021866	HTT
novel_circ_0002090	SOX6
hsa_circ_0003823	CEP70
hsa_circ_0006932	HINFP
novel_circ_0025394	--
hsa_circ_0017439	WDR37
novel_circ_0025713	FBXL4
hsa_circ_0085086	VPS13B
hsa_circ_0085081	VPS13B
novel_circ_0029879	--
hsa_circ_0004803	RNF4
novel_circ_0003896	ITPR2
hsa_circ_0001675	C1GALT1
hsa_circ_0004111	GPBP1L1
novel_circ_0013232	TTC13
novel_circ_0005664	HECTD1
hsa_circ_0025582	AC011604.2;SLCO1B7
hsa_circ_0076560	XPO5
hsa_circ_0006469	LDHA
hsa_circ_0007158	FAM169A
hsa_circ_0040908	ACSF3
hsa_circ_0070012	USO1
hsa_circ_0077765	RNF217
hsa_circ_0075917	--
novel_circ_0010660	ZNF44
hsa_circ_0025897	GXYLT1
hsa_circ_0004123	ETV6
hsa_circ_0004524	CEP70
novel_circ_0003412	TESC
hsa_circ_0010935	MACO1
hsa_circ_0005042	DOCK5
hsa_circ_0030548	NDFIP2
hsa_circ_0008619	ACOT9
novel_circ_0018815	--
hsa_circ_0001543	NR3C1
hsa_circ_0006128	AEBP2
novel_circ_0022731	PPP2CA
hsa_circ_0005003	AGAP1
novel_circ_0003789	AC011604.2;SLCO1B3
hsa_circ_0037655	CREBBP
novel_circ_0003810	AC011604.2;SLCO1B7
novel_circ_0006879	GATM
hsa_circ_0058528	AGFG1
novel_circ_0025009	ALDH5A1
hsa_circ_0053440	BIRC6
novel_circ_0027679	--
novel_circ_0006573	--
novel_circ_0003803	SLCO1B7
novel_circ_0002196	LUZP2
hsa_circ_0005613	RAPH1
hsa_circ_0067435	RYK
hsa_circ_0018848	--
novel_circ_0017066	AOX1
novel_circ_0003829	AC022335.1
hsa_circ_0007587	ZNF451
hsa_circ_0018184	PARD3
novel_circ_0012479	RO60
novel_circ_0024757	TMEM181
novel_circ_0026107	TRIM24
novel_circ_0014616	DPYD
novel_circ_0002960	ZNF143
hsa_circ_0062984	FBXO7
novel_circ_0017999	HEATR5B
hsa_circ_0004405	FAM169A
novel_circ_0029866	--
novel_circ_0018512	VPS54
novel_circ_0003228	PRH1;AC018630.2;TAS2R14
novel_circ_0027929	PCM1
novel_circ_0003411	FBXW8
novel_circ_0028451	XKR9;--
hsa_circ_0068472	RFC4
hsa_circ_0004420	TRABD2A
hsa_circ_0039550	RSPRY1
hsa_circ_0002282	AC068896.1;FAM53B
novel_circ_0021593	--
hsa_circ_0016302	CD46
hsa_circ_0069320	ADGRA3
hsa_circ_0007862	ANKHD1;ANKHD1-EIF4EBP3
hsa_circ_0073836	AC008695.1;RAPGEF6
novel_circ_0018559	APLF
hsa_circ_0083822	HMBOX1
novel_circ_0026116	TRIM24
novel_circ_0004252	SCN8A
hsa_circ_0014877	DCAF8;AL139011.2
hsa_circ_0008117	TOX2
hsa_circ_0002173	CREB1
novel_circ_0013992	TUT4
hsa_circ_0003339	PSMD14
hsa_circ_0006678	TTC28
hsa_circ_0007108	ZFX
hsa_circ_0001083	PMS1
hsa_circ_0018767	P4HA1
hsa_circ_0006080	CATSPERE
novel_circ_0021144	ST3GAL6
novel_circ_0020091	KNG1
novel_circ_0024553	UTRN
hsa_circ_0076704	CD2AP
novel_circ_0002971	SWAP70
novel_circ_0005300	DIS3
hsa_circ_0073121	ARSB
novel_circ_0014504	EVI5
novel_circ_0028450	XKR9
hsa_circ_0070657	SEC24B
novel_circ_0007110	LIPC
