# Supplementary material for: High-throughput circular RNA sequencing reveals the profiles of circular RNA in non-cirrhotic hepatocellular carcinoma
Source: BMC Cancer. 2022 Aug 5;22:857. doi: 10.1186/s12885-022-09909-2 (PMC9356431; doi:10.1186/s12885-022-09909-2)
Supplement: Supplementary file 12 — Additional file 12: Table S9. The binding capacities between circRNAs and miRNAs calculated by miRanda software [file 12885_2022_9909_MOESM12_ESM.xlsx]

## Sheet: Sheet1
The raw data used for statistical analyses of cell experiments
Figure 5A. The relative knockdown effect of si-circ0002473
	si-NC				si-circ0002473
	Expression	SD			Expression	SD
	1	0.1872			0.01097	0.004815
Figure 5B. The relative knockdown effect of si-circ0013894
	si-NC				si-circ0013894
	Expression	SD			Expression	SD
	0.80406	0.1008			0.16095	0.02849
Figure 5C. The relative knockdown effect of si-circ0015002
	si-NC				si-circ0015002
	Expression	SD			Expression	SD
	1.34926	0.2782			0.02873	0.004538
Figure 5D. The relative knockdown effect of si-circ0003283
	si-NC				si-circ0003823
	Expression	SD			Expression	SD
	0.96008	0.1131			0.17967	0.03797
Figure 5E. The CCK-8 results of si-circ0003283
Day	si-NC				si-circ0002473
1	0.284	0.284	0.288		0.275	0.281	0.285
3	0.757	0.819	0.757		0.551	0.572	0.562
5	1.528	1.558	1.532		1.032	1.031	1.044
Figure 5F. The CCK-8 results of si-circ0013894
Day	si-NC				si-circ0013894
1	0.323	0.327	0.327		0.316	0.322	0.322
3	0.757	0.819	0.757		0.551	0.572	0.562
5	1.727	1.827	1.677		1.355	1.264	1.274
Figure 5G. The CCK-8 results of si-circ0015002
Day	si-NC				si-circ0015002
1	0.322	0.321	0.317		0.32	0.32	0.335
3	0.628	0.729	0.761		0.513	0.512	0.48
5	1.426	1.439	1.467		0.856	0.849	0.889
Figure 5H. The CCK-8 results of si-circ0003283
Day	si-NC				si-circ0003823
1	0.326	0.331	0.333		0.327	0.332	0.332
3	0.597	0.648	0.651		0.953	0.964	0.962
5	1.417	1.404	1.422		1.975	2.035	2.148
Figure 5I. The colony formation results
Group	Number of colonies
si-NC	252	237	274
si-circ0002473	183	169	152
si-circ0013894	140	129	158
si-circ0015002	201	183	179
si-circ0003823	336	362	327
Figure 5J. The wound healing results
Group	Area wound healed (%)
si-NC	58.49	62.33	57.02
si-circ0002473	40.19	43.14	41.83
si-circ0013894	44.62	42.19	47.3
si-circ0015002	44.87	48.99	46.21
si-circ0003823	85.82	80.29	78.04
